# 1 **Clinical features and outcomes of scorpion sting in western lowland** 2 **of Eritrea: a prospective descriptive study.**

3  
4 Okbu Frezgi<sup>1,2</sup> Araia Berhane<sup>3</sup>, Adiam Gebreyohannes<sup>4</sup>, Ghide Ghebrawelde<sup>5</sup>, Henok Tekie<sup>5</sup>, Tsegezab  
5 Kiflezgi<sup>5</sup>, Abdulaziz Mohamedsied<sup>5</sup>, Yonas Tekie<sup>5</sup>, Abel Alem<sup>5</sup>, Hagos Ahmed<sup>6</sup>, Tewaldemedhine  
6 Gebrejesus<sup>7</sup>  
7

## 8 **Institutional addresses**

9 <sup>1</sup>Orotta National Referral Maternity Hospital, Ministry of Health, Asmara, Eritrea; <sup>2</sup>Resident in  
10 Gynecology and Obstetrics Unit, Orotta College of Medicine and Health Sciences, Asmara, Eritrea;  
11 <sup>4</sup>Integrated Disease Response and Surveillance, Ministry of Health, Asmara, Eritrea; <sup>5</sup>Tesseney Hospital,  
12 Ministry of Health, Gash Barka, Eritrea; <sup>6</sup>Statistical data processing at National Statistics Office, Asmara,  
13 Eritrea; <sup>7</sup>Volunteer at the National Tuberculosis and Leprosy Control Program of Eritrea, Virginia, USA  
14

## 15 **Email addresses for all authors**

16 OF, [lurgewra@gmail.com](mailto:lurgewra@gmail.com)  
17 AB, [araiabm@gmail.com](mailto:araiabm@gmail.com)  
18 AG, [adiamghe@gmail.com](mailto:adiamghe@gmail.com)  
19 GG, [ghidegere@gmail.com](mailto:ghidegere@gmail.com)  
20 HT, [henokatekie@gmail.com](mailto:henokatekie@gmail.com)  
21 TK, [drtsekipli@gmail.com](mailto:drtsekipli@gmail.com)  
22 AM, [azizms2024@gmail.com](mailto:azizms2024@gmail.com)  
23 YT, [Sonaytk444@gmail.com](mailto:Sonaytk444@gmail.com)  
24 AA, [abelalem779@gmail.com](mailto:abelalem779@gmail.com)  
25 HA, [hagahwo2005@gmail.com](mailto:hagahwo2005@gmail.com)  
26 TG, [tedig47@gmail.com](mailto:tedig47@gmail.com)  
27

28 **Corresponding Author:** Okbu Frezgi,

29 Resident in Gynecology and Obstetrics Unit, Orotta College of Medicine and Health Sciences, Asmara,  
30 Eritrea. Email: [lurgewra@gmail.com](mailto:lurgewra@gmail.com)

31

32

33

34

35 **Word Count:** 5780 words | **Abstract:** 275words | **Figures:** 2 | **Tables:** 5 | **References:** 26

36

37

## 38 Abstract

39 **Background:** Scorpion envenomation is a public health problem that results in a life-threatening medical  
40 emergency in tropical and subtropical regions. Paediatric victims are more at risk to severe envenomation  
41 compared to adults.

42 **Objectives:** This study aimed to determine clinical features and outcome of patients hospitalized due to  
43 scorpion stings at the Tesseney Community Hospital.

44 **Methods:** A prospective, descriptive cross-sectional study conducted from 1<sup>st</sup> June 2019 to 31<sup>st</sup> May 2020  
45 on patients hospitalized due to scorpion stings at the Tesseney Community Hospital.

46 **Results:** 165 scorpion sting patients were admitted during the study period. Majority were older than 15  
47 years old (61.8%) with an approximately equal male-to-female sex ratio (0.94:1). Scorpion sting cases  
48 largely belonged to urban (57%) compared to rural areas. The black scorpion (38.8%) was the  
49 predominately identified scorpion, but in a proportion of cases the scorpion colour was undetermined  
50 (31.5%). The foot was predominate sting site (64.8%) followed by hand (31.5%). A single sting (91.5%)  
51 was more frequently presented compared to multiple stings (8.5%). Majority (94.8%) of scorpion sting  
52 cases occurred during the summer period with highest scorpion stings counts belonging to September and  
53 October. The main clinical manifestations upon presentation were localized pain (70.3%) and sweating  
54 (56.4%) with more severe symptoms exhibited amongst age groups less than 15 years old. The fatality rate  
55 (4.8%) was largely associated age groups less than 15 years old with ( $p = 0.006$ , OR: 2.845; 95% CI: 0.656-  
56 12.343).

57 **Conclusion:** Our study found children experienced more severe envenoming symptoms with related  
58 mortality compared to adults. This study may be a tool to identify at-risk population groups and build  
59 measures to prevent scorpion stings within the western lowlands of Eritrea.

60 **Keywords:** scorpion sting, envenomation, clinical features, Eritrea.

61

62

63

64

65

66

67

68

69

70

## 71 Introduction

72 Scorpion stings are a life-threatening medical emergency with frequent presentations within emergency  
73 department in many areas of the world.(1) Accurate global statistical evidence on scorpion stings are not  
74 readily available, but the literature indicates that all settings are usually affected by this medical threat.(2)  
75 In 2018, WHO reported that the true scorpion sting envenomation burden is not known because many  
76 accidents occur in villages within tropical and subtropical countries where victims likely do not seek  
77 medical attention.(3) It is estimated that 1.23 million scorpion stings occur per year with roughly 3250  
78 deaths per year.(1,2,4–6) Developing countries are often reported with higher scorpion envenomation  
79 accidents and related mortality compared to developed countries due to lower socioeconomic structures and  
80 inadequately equipped health facilities.(2) Pediatric victims are more at risk to severe envenomation with  
81 related mortality compared to adults due to their small body size.(4,7)

82

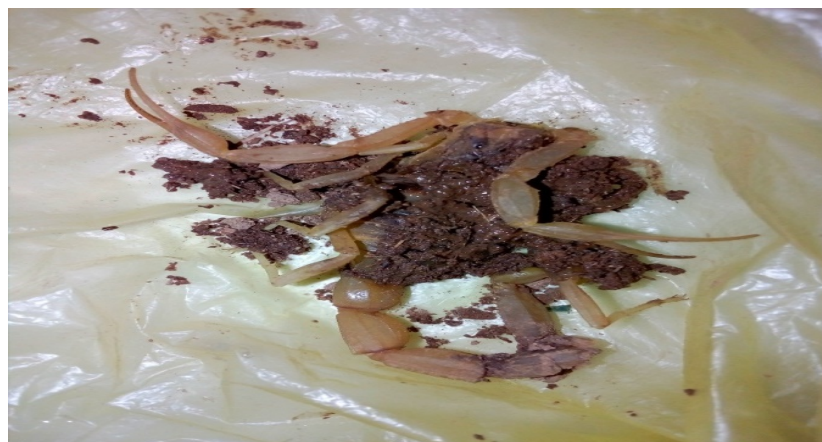

83

84 Figure 1. Yellow-colored scorpion brought into the ED by family members. Envenomated patient  
85 suffered from irreversible shock and pulmonary edema and was thereafter deceased.

86 Scorpions are predatory arachnids with four pairs of legs, a pair of grasping pedipalps, and a narrow-  
87 segmented tail with a characteristic curved back ending with a venomous sting.(5) Scorpions are generally  
88 located in dry and hot environments, although some species also occur in forest and wet savannahs.(5) All  
89 scorpion species are nocturnal, hiding under stones, wood, or tree bark during the day.(5,8) They are coated  
90 in a variety of colours, ranging from straw colour to yellow, and light brown to black.(4) Scorpions have a  
91 remarkable capacity to survive and adapt, allowing them to withstand heat, drought, desert and freezing  
92 conditions which permits the species to survive virtually independently of their environmental  
93 constraints.(5) Currently there are more than 1500 subspecies of scorpion recognized worldwide, with 50  
94 subspecies having dangerous venom for humans.(4,8) The *Parabuthus* (western and southern Africa),  
95 *Hottentotta* (south Africa and south-east Asia), *Leiurus* (northern Africa and middle East), and *Androctonus*  
96 (northern Africa and southeast Asia) scorpion species are reported to be found within the African

97 continent.(5) Within East Africa, scorpion sting cases are common in the central-west regions of Sudan due  
98 to geographical location, climate, and the socioeconomic structure.(8,9) Though there is no ecological  
99 survey of scorpion species done within Eritrea, scorpion sting accidents are found to be common in the  
100 western lowlands of Eritrea which borders Sudan.

101 Scorpion venom is a “cocktail” of complex structures formed by neurotoxic proteins, acidic proteins, salts,  
102 and organic compounds, with variable compositions and lethality amongst subspecies.(4,5,8) Venom  
103 mainly effects neurologic, cardiovascular, respiratory, hematologic, and renal systems with local effects  
104 around the sting site (i.e. redness, pain, swelling, and burning).(4,8) Toxins and enzymes within venom  
105 possess neurological tropism effects that act mainly on voltage-gated sodium and potassium ion channels  
106 on excitable cells of nerves and muscles.(5) Venom from the same scorpion can have multiple toxins that  
107 can interact with each other, modulating the response of the ion channels involved and leading to complex,  
108 rapidly progressive symptoms.(5–8,10–12) The main effect of the venom in a victim is to mediate ion  
109 channels for intense, persistent depolarization of autonomic nerves, leading to massive discharges of  
110 neurotransmitters from both autonomic nervous system branches.(5) This is referred to as an “autonomic  
111 storm” owing to the sudden pouring of endogenous catecholamine into the circulation.(5,11–14) The effects  
112 of an “autonomic storm” are seen throughout the body, but are more serious on the cardiovascular and  
113 respiratory systems leading to arrhythmia, hypertension or hypotension, and pulmonary edema.(15)  
114 Clinically, the “autonomic storm” evoked due to scorpion envenoming is characterized by transient  
115 parasympathetic (vomiting, profuse sweating, ropy salivation, bradycardia, ventricular premature  
116 contraction, priapism in male, and hypotension) and prolonged sympathetic (cold extremities, hypertension,  
117 tachycardia, pulmonary edema, and shock) stimulation.(5,16–19)

118 Signs and symptoms of scorpion stings are divided into three classes commonly known as the Abroug’s  
119 classification. (4–6,8,11,14,20) Majority of scorpion sting cases only require supportive therapy, including  
120 ibuprofen, cleaning of the sting area, and tetanus prophylaxis. In certain areas of the world where scorpions  
121 are more poisonous (i.e., the Middle East), scorpion stings are treated with drugs and methods that reduce  
122 symptoms and complications.(21) Over the course of the 20<sup>th</sup> century, scorpion antivenom (SAV),  
123 vasodilators, and intensive care facilities have significantly reduced the fatality rate of severe scorpion  
124 envenomation.(5) Administering SAV can neutralize unbound circulating venom to reduce the probability  
125 of sympathetic nervous system over-stimulation.(5) Though the benefits of SAV has been proven in some  
126 studies, the effectiveness of SAV continues to be debated.(4,5,19,22) A critical component of scorpion sting  
127 pathogenesis is alpha-receptor stimulation.(5,14) Prazosin is an  $\alpha_1$ -blocker commonly known as a  
128 pharmacological and physiological antidote to the venom action. The drug acts to relieve serious breathing  
129 difficulty due to high blood pressure.(5,12) As a phosphodiesterase inhibitor, the drug reduces blood  
130 pressure via reducing preload and left ventricular impedance without increasing heart rate.(5) Previous  
131 studies have recommend prazosin as a first-line treatment for patient arriving to the ED with scorpion  
132 envenoming due to the drugs high availability in rural settings.(12,23)

133 This study aims to describe the clinical manifestations and outcomes of scorpion sting patient cases  
134 admitted at Tesseney Community Hospital. The study seeks to inform medical professionals and public  
135 health workers to design better preventive measures to reduce scorpion sting incidents within Eritrea.

## 136 **Objective**

137 **General objective:** The study aims to provide clinical features and outcomes of patient admitted to  
138 Tesseney Community Hospital due to scorpion stings.

139 **Specific objective:** To describe the clinical features of scorpion stings and to determine the risk factors  
140 associated with fatal outcomes.

## 141 **Materials and Methods**

142 **Study design:** This was a prospective, descriptive cross-sectional study conducted from 1<sup>st</sup> June 2019 to  
143 31<sup>st</sup> May 2020 for patients admitted to due to scorpion stings at the Tesseney Community Hospital.

144 **Study area:** Tesseney hospital is a community hospital located in Gash-Barka region of Eritrea that serves  
145 a catchment population of 87,992 distributed in an area of 1,096.83 km<sup>2</sup> (Figure 2). The hospital provides  
146 inpatient and outpatient services, delivery service, laboratory services, imaging unit, physiotherapy unit,  
147 and possess a 115-bed capacity.

148

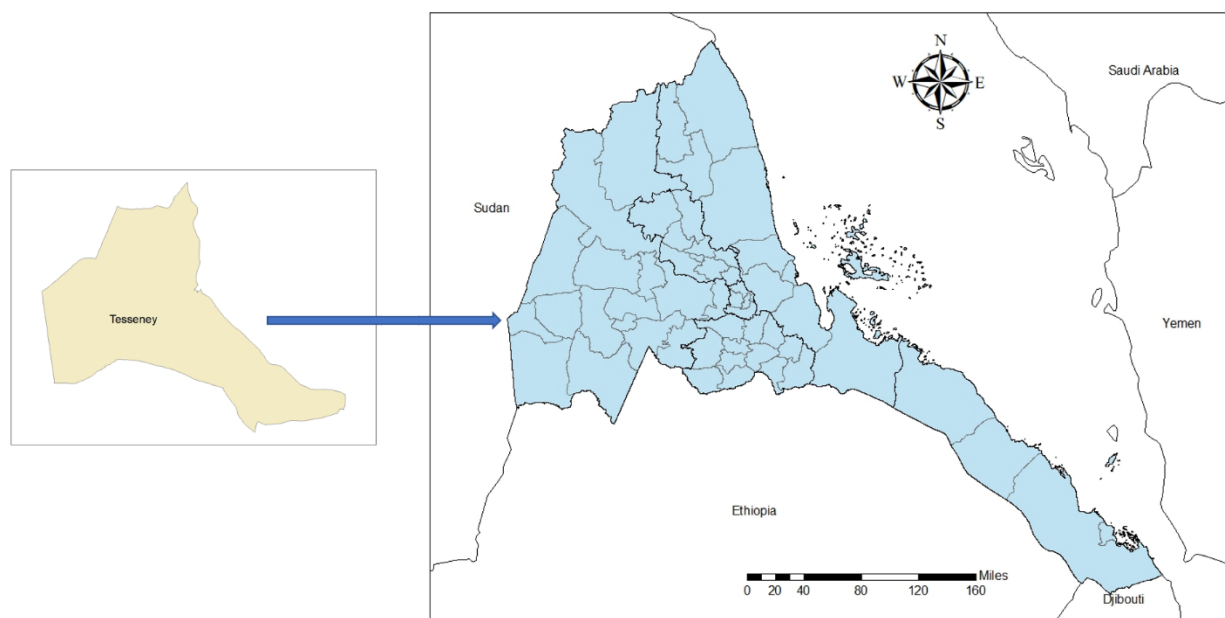

149

150 Figure 2. Map of Eritrea, Tesseney subzone.

151

152 **Study population:** All patients admitted to the hospital due to scorpion stings from 1<sup>st</sup> June 2019 to 31<sup>st</sup>  
153 May 2020 were considered the study population.

154 **Inclusion and exclusion criteria:** Patient who had a history of scorpion sting and had seen or killed the  
155 scorpion (via the victim or bystander) were also included as the study. Patients with a history of unknown  
156 bites, arrived to the ED without signs of life, and/or deceased after discharge from the hospital were  
157 excluded from the study.

158 **Data collection and analysis:** Data was collected by admitting doctors in a predesigned questionnaire  
159 survey prepared in open data kit (ODK) and were followed until the final outcome. Demographic  
160 characteristics, vital signs, symptoms and signs, time interval between scorpion sting incident and arrival  
161 at the hospital, and medications administered were recorded. Statistical analyses were performed via  
162 Statistical Package for the Social Sciences (SPSS) v.23 software. The symptoms and signs were categorized  
163 into three classes according to Abroug's classification (Table 1). The Abroug's classification was utilized  
164 due to the catalogue's convenience and its common use in neighbouring countries (Table 1).(4–  
165 6,8,11,14,20) Descriptive data were expressed as frequency and percentage while intergroup differences  
166 were analysed using Chi-Square or Fisher test depending on the characteristics of the data (p-value < 0.05  
167 as statistically significant).

168 Table 1. Abroug's classification.

| Classes   | Signs and Symptoms                                                                        |
|-----------|-------------------------------------------------------------------------------------------|
| Class I   | Pain and/or paraesthesia at the scorpion sting site                                       |
| Class II  | Fever, chills, excessive sweating, nausea, vomiting, diarrhea, hypertension and priapism. |
| Class III | Cardiovascular, respiratory, and/or neurologic                                            |

169

170 **Ethical approval:** The study received ethical approval from the Ministry of Health Research and Ethics  
171 Approval Committee. A written informed consent was obtained from each patient or parent/care taker for  
172 children. Confidentiality of study participants was maintained by analysing anonymised aggregate data and  
173 coding the personal identifiers. Patients were reassured no environmental or occupational harm by  
174 participating within this study. All patient subjects were provided the available standard treatment for their  
175 disease process.

176

## 177 Results

178 A total of 165 patients with scorpion stings were admitted to the Tesseney community hospital from 1<sup>st</sup>  
179 June 2019 to 31<sup>st</sup> May 2020. Our results had an almost similar sex distribution (male = 48.5%; female =  
180 51.5%) with a male-to-female sex ratio of 0.94:1. The majority of cases were from urban areas (57%)  
181 compared to rural areas. Majority (61.2%) were older than 15 years old while 38.2% of cases were younger  
182 than 15 years old (Table 2). The mean, median, and standard deviation of age according to their sex were  
183 26.03, 17.50 and 19.73 for males and 23.89, 20.00, 16.56 for females, respectively. According to  
184 educational status, 38.2% of cases were illiterate or had no formal education, 34.4% had elementary level  
185 education, and 27.3% had middle or higher levels of education (Table 2). As to occupational frequency,  
186 shepherds (31.5%), farmers (21.2%), and students (26.9%) ranked the highest while the remaining were  
187 registered as other (21.2%).

188 Table 2. Distribution of scorpion sting outcomes according to socio-demographic factors.

| Characteristics    |                     | Total |      | Outcome   |      |      |     |         |                      |
|--------------------|---------------------|-------|------|-----------|------|------|-----|---------|----------------------|
|                    |                     |       |      | Recovered |      | Died |     | p-value | OR (95% CI)          |
|                    |                     | N     | %    | N         | %    | N    | %   |         |                      |
| Age                | <15 years           | 63    | 38.2 | 58        | 92.1 | 5    | 7.9 | 0.06    | 2.845 (0.656-12.343) |
|                    | ≥15 years           | 102   | 61.8 | 99        | 97.1 | 3    | 2.9 | ---     | 1                    |
| Sex                | Male                | 80    | 48.5 | 76        | 95.0 | 4    | 5.0 | 0.930   | 1.066 (0.257-4.413)  |
|                    | Female              | 85    | 51.5 | 81        | 95.3 | 4    | 4.7 | ---     | 1                    |
| Level of Education | No formal education | 63    | 38.2 | 60        | 95.2 | 3    | 4.8 | 0.08    | 1.075 (0.172-6.712)  |
|                    | Elementary          | 57    | 34.4 | 54        | 94.7 | 3    | 5.3 | 0.09    | 1.194 (0.191-7.472)  |
|                    | Middle or above     | 45    | 27.3 | 43        | 95.6 | 2    | 4.4 | ---     | 1                    |
| Occupation         | Farmer              | 35    | 21.2 | 34        | 97.1 | 1    | 2.9 | ---     | 1                    |
|                    | Shepard             | 52    | 31.5 | 48        | 92.3 | 4    | 7.7 | 0.361   | 2.833 (0.303-26.479) |
|                    | Student             | 43    | 26.9 | 43        | 100  | 0    | 0.0 | 0.793   | 1.360 (0.136-13.554) |
| Religion           | Christian           | 45    | 27.3 | 70        | 94.6 | 4    | 5.4 | 0.764   | 1.243 (0.300-5.148)  |
|                    | Muslim              | 120   | 72.7 | 87        | 95.6 | 4    | 4.4 | ---     | 1                    |

189

190 Prior history of scorpion sting was found in 34.5% of the cases while patient experiencing their first sting  
 191 was found in 65.5% of the cases. The black scorpion (38.8%) was the predominantly identified scorpion  
 192 followed by yellow/red/white (30.3%) with the rest declared as unknown (31.5%) (Table 3). The site of  
 193 sting was mostly located on the foot (64.8%) followed by hand (31.5%). Concerning the time of the scorpion  
 194 sting incident, 62.4% of the sting occurred at night-time compared to 37.6% during the daytime. Indoor  
 195 stings (56.4%) were slightly higher compared to outdoor stings (43.6%) (Table 3). Of all admitted patients,  
 196 eight were deceased; thus, the case fatality rate was 4.8%. The fatality outcome was largely associated with  
 197 class III scorpion sting ( $p = 0.088$ ).

198 Table 3. Distribution of scorpion sting outcomes according to scorpion characteristics and Abroug's  
 199 classification.

| Characteristics |         | Total |      | Outcome   |      |      |     |         |                      |
|-----------------|---------|-------|------|-----------|------|------|-----|---------|----------------------|
|                 |         |       |      | Recovered |      | Died |     | p-value | OR (95%CI)           |
|                 |         | N     | %    | N         | %    | N    | %   |         |                      |
| Place of Sting  | Indoor  | 93    | 56.4 | 90        | 96.8 | 3    | 3.2 | 0.281   | 1                    |
|                 | Outdoor | 72    | 43.6 | 67        | 93.1 | 5    | 6.9 | ---     | 2.239 (0.517-9.697)  |
| Colour of       | Black   | 64    | 38.3 | 62        | 96.9 | 2    | 3.1 | 0.817   | 2.696 (0.473-15.353) |

|                         |                      |     |      |     |      |   |     |       |                      |
|-------------------------|----------------------|-----|------|-----|------|---|-----|-------|----------------------|
| Scorpion                | Red, Yellow, & White | 50  | 30.3 | 46  | 92   | 4 | 8   | 0.264 | 1                    |
|                         | Unknown              | 52  | 31.5 | 49  | 94.2 | 2 | 3.8 | ---   | 1.265 (0.172-9.307)  |
| Site of sting           | Hand                 | 52  | 31.5 | 51  | 98.1 | 1 | 1.9 | ---   | 1                    |
|                         | Foot                 | 113 | 64.8 | 106 | 93.8 | 7 | 6.2 | 0.262 | 3.368 (0.404-28.108) |
| Number of Stings        | Single               | 151 | 91.5 | 144 | 95.4 | 7 | 4.6 | ---   | 1                    |
|                         | Multiple             | 14  | 8.5  | 13  | 92.9 | 1 | 7.1 | 0.679 | 1.582 (0.181-13.870) |
| Abroug's Classification | Class I              | 33  | 20.6 | 33  | 96.3 | 1 | 2.9 | ---   | 1                    |
|                         | Class II             | 59  | 35.8 | 58  | 94.2 | 1 | 1.7 | 0.355 | 2.726 (0.326-22.800) |
|                         | Class III            | 72  | 43.6 | 66  | 91.7 | 6 | 8.3 | 0.088 | 4.136 (0.809-21.141) |

200

201

202 The most common clinical manifestations were localized pain (70.3%), sweating (56.4%), vomiting  
 203 (33.9%), paraesthesia (29.2%), relative bradycardia (24.8%), restlessness (24.2%), fever (19.4%), and  
 204 shock (3.6%) (Table 4). Patient subjects less than 15 years old ( $p = 0.006$ , OR: 2.845; 95% CI: 0.656-12.343)  
 205 and those who had no formal education ( $p = 0.008$ , OR: 1.075 (0.172-6.712)) showed a possible predisposing  
 206 factor to the severity of symptom (Table 1). Neither the number of stings, the colour of the scorpion, nor  
 207 the sex of the victim were found to be significant risk factors for severity of symptoms (Table 3). According  
 208 to Abroug's classification, 43.6% cases had class three, 35.8% cases had class two, and 20.6% cases had  
 209 class one (Table 3). Children under five years of age held class III scorpion stings at presentation in 75%  
 210 of the cases.

211 Of all admitted patients, cases with mild symptoms (class I) were managed with local anaesthesia (84.8%)  
 212 and oral analgesics (41.4%). Patients experiencing generalized pain, restlessness, and convulsions were  
 213 managed with diazepam (23.6%), with a minority of patients requiring IV fluids (1.9%) and antibiotics  
 214 (1.2%). Cases with moderate to severe symptoms (class II-III) were managed with Nifedipine and/or SAV  
 215 (15.2%) (Table 5).

216 Table 4. Distribution of scorpion sting envenomation symptoms compared to socio-demographic factors.

| Signs and Symptoms          | Sex (%) |        | Age in years (%) |      |       |      | Total (%) |
|-----------------------------|---------|--------|------------------|------|-------|------|-----------|
|                             | Male    | Female | <5               | 5-14 | 15-49 | 50+  |           |
| Fever                       | 20.0    | 18.8   | 16.7             | 23.5 | 19.0  | 13.0 | 19.4      |
| Elevation of Blood Pressure | 1.3     | 4.7    | 0.0              | 3.9  | 3.8   | 0.0  | 3.0       |
| Relative bradycardia        | 20.0    | 29.4   | 50.0             | 29.4 | 20.3  | 17.4 | 24.8      |
| Vomiting                    | 30.0    | 37.6   | 58.3             | 47.1 | 25.3  | 21.7 | 33.9      |
| Sweating                    | 60.0    | 52.9   | 83.3             | 66.7 | 49.4  | 43.5 | 56.4      |
| Shock                       | 3.8     | 3.5    | 16.7             | 3.9  | 1.3   | 4.3  | 3.6       |
| Semi-consciousness          | 2.5     | 5.9    | 16.7             | 3.9  | 2.5   | 4.3  | 4.2       |



|                    |      |      |      |      |      |      |      |
|--------------------|------|------|------|------|------|------|------|
| Restlessness       | 21.3 | 27.1 | 33.3 | 35.3 | 16.5 | 21.7 | 24.2 |
| Convulsion         | 1.3  | 1.2  | 16.7 | 0.0  | 0.0  | 0.0  | 1.2  |
| Hypertonic muscles | 1.3  | 3.5  | 0.0  | 2.0  | 3.8  | 0.0  | 2.4  |
| Cyanosis           | 0.0  | 1.2  | 0.0  | 0.0  | 1.3  | 0.0  | 0.6  |
| Drooling           | 17.5 | 18.8 | 66.7 | 19.6 | 7.6  | 26.1 | 18.2 |
| Paresthesia        | 20.0 | 37.6 | 16.7 | 25.5 | 27.8 | 47.8 | 29.1 |
| Dyspepsia          | 2.5  | 5.9  | 8.3  | 7.8  | 2.5  | 0.0  | 4.2  |
| Pulmonary edema    | 0.0  | 1.2  | 0.0  | 2.0  | 0.0  | 0.0  | 6.0  |
| Generalized pain   | 28.8 | 24.7 | 33.3 | 27.5 | 20.3 | 43.5 | 26.7 |
| Localized pain     | 66.3 | 74.1 | 50.0 | 70.6 | 78.  | 52.2 | 70.3 |

217

218 Table 5. Distribution of treatment options based on Abroug's classification.

| Treatment        | Class I (%) | Class II (%) | Class III (%) | Total (%) |
|------------------|-------------|--------------|---------------|-----------|
| Local Anesthesia | 97.1        | 84.7         | 79.2          | 84.8      |
| Oral Analgesics  | 14.7        | 40.7         | 54.2          | 41.2      |
| Diazepam         | 2.9         | 22.0         | 34.7          | 23.6      |
| IV Fluids        | 0.0         | 5.1          | 20.8          | 10.9      |
| Antibiotics      | 0.0         | 0.0          | 2.8           | 1.2       |
| Other            | 2.9         | 16.9         | 19.4          | 15.2      |

219

220 Scorpion sting cases were being admitted throughout the year, the highest case count occurred during the  
 221 summer season (93%) with September and October being the leading months (Figure 3). Within the summer  
 222 season, 94.8% of patient cases recovered with seven fatalities during this period.

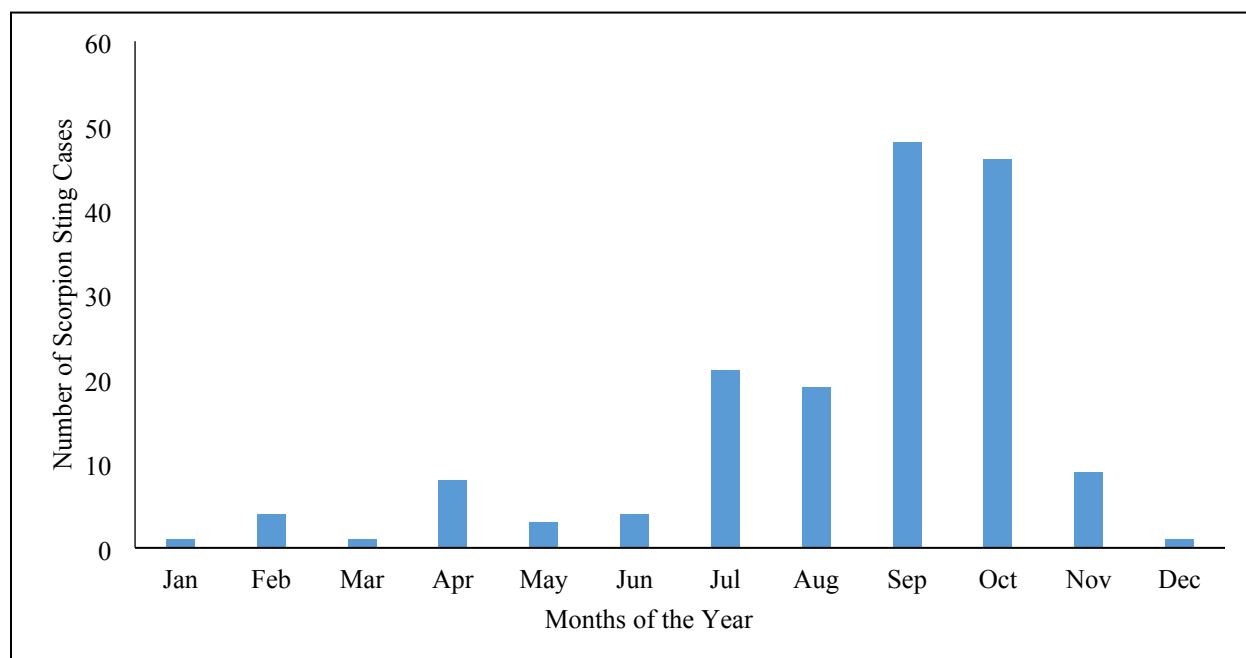

223

224 Figure 3. Total number of scorpion sting cases within western lowlands of Eritrea.

225

## 226 Discussion

227

228 Although medical science has advanced in recent decades, scorpion envenomation has largely been ignored  
229 due to unknown prevalence of scorpion stings and a high number of low-income victims.(2) Majority of  
230 scorpion sting accidents occur in villages in tropical or subtropical regions where the victim do not fully  
231 appreciate the seriousness of the medical threat. Thus, victims rely more on traditional healers and remain  
232 unregistered in a healthcare setting.(3) In this aspect, to reduce the incidence of scorpion stings and their  
233 complications, the 4<sup>th</sup> International Conference on Snakebites and Scorpion Stings in Dakar stressed the  
234 need to develop better recording and reporting systems and optimize the gathering of data on scorpion  
235 injuries.(2) The western lowlands of Eritrea have shown to be a conducive area for scorpions with a recent  
236 surge of scorpion stings cases within the region, inciting the need for this study. This study is a descriptive,  
237 cross-sectional study of scorpionism within the western lowlands of Eritrea with study setting based within  
238 the Tesseney Community Hospital. The Tesseney community hospital is the only hospital that receives  
239 scorpion sting cases within the region, other corresponding hospital have no similar reports.

240 Our study held roughly an equal male-to-female ratio (0.94:1). This finding is in contrast to other studies  
241 that report higher male-to-female ratio within the Middle East and North Africa (MENA) region where  
242 deadly scorpion stings are most common.(2,4,21) Male-to-female ratios differ depending on the study  
243 design and region; some studies report higher male-to-females ratios or vice versa.(2,21) These different  
244 findings can likely be attributed to the differing social and demographics factors rather than climate and  
245 geographical factors. Age groups older than 15 years old were more frequently affected by scorpion stings  
246 (61.8%) compared to age groups less than 15 years old (38.2%). The Gash-Barka region is also commonly  
247 known as the “bread basket of Eritrea” with the majority of the older male population employed in  
248 agriculture or animal herding. Scorpion sting victims older than 15 years old usually performed work  
249 outdoors (e.g., shepherd or farmer) and were more likely to be exposed to a scorpion habitat to be stung.  
250 Our results report most victims were from an urban (57%) compared to a rural setting. The literature often  
251 reports scorpion sting victims typically originate from rural compared to urban areas which contrasts with  
252 our findings. Due to the dependence on subsistence agriculture and low socio-economic structure across the  
253 Gash-Barka region in which people living in urban areas were using firewood for cooking from rural areas  
254 may be attributed to increased number. Beside the criteria classifying rural and urban areas is not definitive.  
255 Thus, accurate classification of patient’s place of residence was not possible during the study.

256 Previous studies report that sting sites are commonly located on the extremities compared to the head or  
257 trunk.(4,11,12) Our results showed that 96.2% of sting sites were located in the extremities with a majority  
258 of sting sites on the foot (64.8%) compared to the hand (31.5%). Scorpion hiding in shoes left empty  
259 overnight or in pockets of loose clothing or trousers are common cause for being stung on the hand or  
260 foot.(5) Furthermore, wearing sandals instead of close-toed shoes, working in unprotected fields, and  
261 children running barefoot are common occurrence within the Gash Barka region due to the predominate  
262 agriculture lifestyle and low socio-economic structure.(4) Our study reports night-time stings (62.4%) were  
263 more common compared to daytime stings which corresponds with previous studies.(2,8) An explanation  
264 for higher night-time stings may be attributed to residents collecting firewood and storing the firewood  
265 inside their residential compound. Firewood is a typical scorpion habitat within the region. As nocturnal

266 animals, scorpions would leave their habitat at night to hunt and may come in contact with a foot or hand  
267 of person sleeping on the floor or elevated bed.

268 Previous studies have shown the prevalence of scorpion sting accidents are more common during the  
269 summer season than the winter/autumn season.(2,4) Warm temperature and sunny weather are conditions  
270 that leads to higher number of envenomation accidents.(2) Our results aligned with the majority of literature  
271 findings; the western lowlands of Eritrea had the highest scorpion sting incidence during the summer period  
272 (93%) with September and October being the leading months. The MENA region also report similar  
273 conditions with Morocco having the highest scorpion sting incidence between June and September, Saudia  
274 Araba between May and September, and Iran between April and October.(4) Our findings showed that  
275 black-coloured scorpions (38.3%) were the highest report count followed by yellow/red/white (30.3%),  
276 with the remaining cases reported as undetermined (30.9%). A study in Morocco showed similar results  
277 with the most common scorpion colour being yellow (41.7%) and black (27.6%) with the remaining being  
278 unknown (30.7%).(9) A epidemiological study done in south-eastern Turkey also showed that black and  
279 yellow coloured scorpions were predominately identified within their study.(4)

280 The clinical features of scorpion sting often depend on the subspecies of scorpion, lethality of venom,  
281 venom amount injected, age and feeding characteristics of the scorpion as well as seasonal conditions.(4,8)  
282 Different species of scorpions have different types of venom which may cause local as well as systemic  
283 effects in the first few hours.(1,4,7,9–11,22,24) Systemic manifestations (cardiovascular toxicity,  
284 respiratory failure, hypertension and hypotension, etc) are observed at various sites throughout the body  
285 and appear within the first 12-24 hours following immediate local effects around the sting site.(4) Within  
286 our study, the most common clinical manifestations were localized pain (70.3%), sweating (56.4%), and  
287 vomiting (33.9%). Class II-III manifestations were mainly observed amongst age groups less than 15 years  
288 old with cardiac rhythm disorder, shock, convulsions, and semi-consciousness being the most common  
289 manifestations. In terms of cardiac rhythm disorder, bradycardia was more commonly observed compared  
290 to tachycardia. Overall, these findings align with previous studies that report the severity of envenomation  
291 was found higher in children compared to adults with related mortality rate.(9,13) Age groups less than 15  
292 years old passing away from class II-III manifestations contributed most to the fatality rate (4.8%), likely  
293 due to cardiac dysfunction or pulmonary edema.(4) Patient less than 15 years old ( $p = 0.006$ ) and had an no  
294 formal education ( $p = 0.008$ ) showed a possible predisposing risk factor for the severity of symptom or  
295 death. Within the literature, children are often reported with higher severity of scorpion envenomation  
296 symptoms, likely attributed to their smaller body size.(9) With a smaller body mass, venom could diffuse  
297 and act more rapidly on the autonomic nervous system, thus have a higher likelihood of systemic  
298 involvement in which positions an individual to a higher risk of death.

299 Our results exhibited an unusually high class III envenoming symptoms (43.6%) compared to similar  
300 studies in the literature.(1,22) This was largely due to the villager's mindset towards arachnid bites or stings.  
301 Upon a scorpion sting accident, adult victims (greater than 15 years old) would likely stay at home if they  
302 feel mild symptoms, relieving their pain by cleaning the sting site using traditional home remedies. Adult  
303 victims would likely seek medication attention only if symptoms from the scorpion sting felt moderate to  
304 severe. This may take as long as day or two after the incident had occurred. Children scorpion sting victims  
305 (less than 15 years old), however, were immediately admitted to a hospital because pain was intolerable.  
306 For adults, the longer elapsed time increased the probability of developing systemic effects and  
307 experiencing an "autonomic storm", thus classifying the patient symptoms as class III. If adult patients

308 recognized the severity of the medical threat and were hospitalized early-on, medication management and  
309 monitoring would likely prevent systemic effects.

310 In terms of medication management, Nifedipine and/or SAV were given in replacement of prazosin for  
311 cases presenting with class III symptoms. Nifedipine is often used to treat high blood pressure and is  
312 considered a 2<sup>nd</sup> line treatment with subpar results compared to prazosin. Only 15.2% of cases received  
313 either Nifedipine and/or SAV to relieve class III symptoms. Ampicillin or ceftriaxone were often used as a  
314 prophylaxis for critical patients who appeared septic and already possessed a catheter. Diazepam was only  
315 administered when SAV was not given. Diazepam was used as a sedative for patients experiencing  
316 convulsions, shock, and/or restlessness. Within the literature, in cases where severe pulmonary edema,  
317 neurotoxicity, and circulatory failure are present, oxygen, sublingual nifedipine, digoxin, furosemide,  
318 aminophylline, dopamine, vitamin K, and fresh frozen plasma may be given.(4,12,16) Phenobarbital and  
319 dexamethasone may be administered for 48 hours in cases with convulsions.(4,12,16)

### 320 **Limitation of the Study**

321 Our study is a prospective study with data limited from a single hospital within the Gash-Barka region.  
322 Within this region, victims who suffer scorpion stings may not have registered into a healthcare setting,  
323 thus did not have their experience documented. There were also limitations to accurate data recording  
324 include identification of scorpion colour and definitive rural vs urban criteria when registering patients.  
325 Follow-up after discharging patients also was not performed. Thus, fatalities at home days after discharge  
326 were often heard via word-of-mouth and were not included in the study. During the study period,  
327 medication efficacy was difficult to determine as SAV stocks ran-out and prazosin therapy was also not  
328 available due to budget constraints.

### 329 **Conclusion**

330 Our results indicate the main clinical features of scorpion stings were localized pain, sweating, and  
331 vomiting. Majority of scorpion envenomation victims were older individuals working in agriculture and  
332 unaware to a typical scorpion habitat while performing daily activities. The unusual high level of class III  
333 symptoms is likely a consequence of the villager mindset toward arachnid stings, thus most cases had  
334 immediate effects around the sting site with mild, rarely fatal, systemic involvement. Although the scorpion  
335 sting burden is higher in adults compared to children, our study found that the severity of scorpion  
336 envenomation is greater in children compared to adults. Envenomation severity was indicated by the high  
337 frequency of class III symptoms found in children, such as cardiac rhythm disorder and convulsions, as  
338 well as related fatality rate.

### 339 **Recommendation**

340 Preventive educational programs targeting at-risk groups are instrumental to prevent scorpion sting  
341 accidents and fatalities in resource-limited areas. Enjehay, a small agriculture-based village in the Gash-  
342 Barka region, was recently given a prevention health program due to their alarming high scorpion sting  
343 case count compared to their small population size. The program advised to wear close-toed shoes, use  
344 mosquito nets, and to place firewood outside the residential compound (away from beds and children) as  
345 firewood was a common scorpion habitat. Improved awareness of scorpion sting dangers and increased  
346 care-seeking behaviour to a health centre compared to using traditional healing practices was observed by

347 the Tesseney healthcare staff, encouraging broader use of the preventive program. It is also suggested that  
348 further qualitative and quantitative studies be performed to investigate the awareness of scorpion stings  
349 dangers amongst at-risk population groups (i.e., adolescent and children) as well as typical activities that  
350 incite a scorpion sting accident. Investigating healthcare workers care of envenomed patients and capacity  
351 to distinguish classes of severity during peak season (i.e., September and October) would also be beneficial  
352 to determine competency on efficient drug administration in a resource-limited area.

353 Equipping healthcare facilities with essential drugs (i.e., prazosin therapy) and educating medical  
354 professionals on management of complicated cases, particularly paediatric victims, by introducing updated  
355 guideline for treatment are essential. Education programs focused on mother-child and adolescent care on  
356 precautionary measures needed to prevent scorpion stings are opportunities to reduce probability of  
357 scorpion sting accidents.

358 Surveys to determine the typical habitats of scorpions, seasonal variation of scorpion sting prevalence,  
359 and identifying common scorpion species in scorpion sting prevalent regions are important factors to  
360 consider when building effective preventative measures. Since most of the stings are at night, mosquito  
361 nets can protect scorpion stings. In endemic areas of venomous stings, clothing, beddings, shoes, and  
362 packages should be vigorously shaken out and checked for scorpions without blindly putting hands.  
363 Pesticides (i.e., organophosphates, pyrethrums, and chlorinated hydrocarbons) are also known to kill  
364 scorpions.

#### 365 **Declarations**

366  
367 **Ethical approval:** Ethical approval was obtained from zonal branch of Ministry of Health Research and  
368 Ethical Approval Committee and a written informed consent obtained from the patient to participate in this  
369 report and publish.

370 **Conflict of interest:** Authors have no any conflict of interest to disclose

371 **Fund:** The research had no any source of fund

372 **Consent:** A written informed consent was taken from the patients and data confidentiality was secure.

373

#### 374 **Author's contribution**

375 **Conceptualization:** Okbu Frezgi, Araia Berhane, Henok Tekie, Adiam Gebreyohannes.

376 **Methodology:** Okbu Frezgi, Araia Berhane, Hagos Ahmed, Ghide Ghebrawelde, Henok Tekie, Tsegezab  
377 Kiflezgi, Abdelaziz Mohamedsied, Yonas Tekie, Abel Alem.

378

379 **Investigation:** Okbu Frezgi, Ghide Ghebrawelde, Henok Tekie, Tsegezab Kiflezgi, Abdelaziz  
380 Mohamedsied, Yonas Tekie, Abel Alem.

381

382 **Formal analysis:** Okbu Frezgi, Araia Berhane, Hagos Ahmed, Henok Tekie.

383 **Supervision:** Araia Berhane

384

385 **Resources:** Okbu Frezgi,

386

387 **Validation: \*\*\***

388

389 **Visualization:** Tewaldemedhine Gebrejesus,

390

391 **Writing – original draft:** Okbu Frezgi

392

393 **Writing – review & editing:** Okbu Frezgi, Araia Berhane, Tewaldemedhine Gebrejesus.

394

## 395 **Abbreviations**

396 Middle East and North Africa (MENA), Scorpion Antivenom (SAV), Emergency Department (ED),

397 World Health Organization (WHO).

## 398 **Author’s information**

399 Okbu Frezgi, MD, Obstetrics and Gynaecology unit, Orotta College of Medicine and Health Science, Post-  
400 graduate, Ministry of Health, Asmara, Eritrea. Email. [lurgewra@gmail.com](mailto:lurgewra@gmail.com)

401

402 Araia Berhane, MD MSc, Communicable Disease Control Division, Ministry of Health, Asmara, Eritrea.

403

404 Adiam Gebreyohannes, BS, Integrated Disease Response and Surveillance. Ministry of Health, Eritrea.  
405 Email: [adiamghe@gmail.com](mailto:adiamghe@gmail.com)

406

407 Ghide Gebreweld, MD, Tesseney Hospital, Zoba Gash Barka, Ministry of Health, Tesseney, Eritrea. Email  
408 [ghidegere@gmail.com](mailto:ghidegere@gmail.com)

409 Henok Tekie, MD, Northern Red Sea zone, Ministry of Health, Massawa, Eritrea. Email  
410 [henokatekie@gmail.com](mailto:henokatekie@gmail.com)

411 Abdulaziz Mohamed Sied, MD, Tesseney Hospital, Zoba Gash Barka, Ministry of Health, Tesseney,  
412 Eritrea: [azizms2024@gmail.com](mailto:azizms2024@gmail.com)

413 Tsegezeab Kiflezgi, MD, Adi Keih Hospital, Zoba Debu, Ministry of Health, Adi Keih, Eritrea. Email  
414 [drtsekifli@gmail.com](mailto:drtsekifli@gmail.com)

415 Yonas Tekie, BSN, Tesseney Hospital, Zoba Gash Barka, Ministry of Health, Tesseney, Eritrea. Email  
416 [Sonaytk444@gmail.com](mailto:Sonaytk444@gmail.com)

417 Abel Alem, BSN, Tesseney Hospital, Zoba Gash Barka, Ministry of Health, Tesseney, Eritrea. Email  
418 [abelalem779@gmail.com](mailto:abelalem779@gmail.com)

419 Hagos Ahmed, National Statistics Office, Asmara Eritrea. Email: [hagahwo2005@gmail.com](mailto:hagahwo2005@gmail.com)

420

421 Tewaldemedhine Gebrejesus, BS, Volunteer at National Tuberculosis and Leprosy Control Program,  
422 Ministry of Health, Virginia, USA. Email: [tedig47@gmail.com](mailto:tedig47@gmail.com)

## 423 References

- 424 1. Alkahlout BH, Abid MM, Kasim MM, Haneef SM. Epidemiological review of scorpion stings in  
425 Qatar. *Saudi Med J*. 2015;36(7):851–5.
- 426 2. Khatony A, Abdi A, Fatahpour T, Towhidi F. The epidemiology of scorpion stings in tropical  
427 areas of Kermanshah province, Iran, during 2008 and 2009. *J Venom Anim Toxins Incl Trop Dis*  
428 [Internet]. 2015;21(45). Available from: <http://dx.doi.org/10.1186/s40409-015-0045-4>
- 429 3. Bawaskar HS, Bawaskar PH. Management of snake bite and scorpion sting. Vol. 60, *Quarterly*  
430 *Medical Review*. Mumbai: Raptakos, Brett & Co. Ltd.; 2009.
- 431 4. Yılmaz F, Arslan ED, Demir A, Kavalcı C, Durdu T, Yılmaz MS, et al. Epidemiologic and clinical  
432 characteristics and outcomes of scorpion sting in the southeastern region of Turkey. *Ulus Travma*  
433 *Acil Cerr Derg*. 2013;19(5):417–22.
- 434 5. Bawaskar HS, Bawaskar PH. Scorpion sting: update. *Japi*. 2012;60:46–55.
- 435 6. Chippaux J-P. Emerging options for the management of scorpion stings. *Drug Des Devel Ther*.  
436 2012;6:165–73.
- 437 7. Pradesh U, Bansal A, Bansal AK, Kumar A. Clinical profile of scorpion sting from north Uttar  
438 Pradesh, India. *Int J Med Sci Public Heal*. 2015;4(1):134–7.
- 439 8. Ali NOM, Ali NOM. Scorpion sting in different regions of Sudan: epidemiological and clinical  
440 survey among university students. *Int J Bioinforma Biomed Eng*. 2015;1(2):147–52.
- 441 9. Abourazzak S, Achour S, El Arqam L, Atmani S, Chaouki S, Semlali I, et al. Epidemiological and  
442 clinical characteristics of scorpion stings in children in Fez, Morocco. *J Venom Anim Toxins incl*  
443 *Trop Dis*. 2009;15(2):255–67.
- 444 10. Riaño-umbarila L, Ilse VG, Ledezma-candanoza LM, Olamendi-portugal T, Remi E. Generation  
445 of a broadly cross-neutralizing antibody fragment against several mexican scorpion venoms.  
446 *Toxins (Basel)*. 2019;11(32):1–17.
- 447 11. Soren C, Nageswara Rao K. Clinical profile of scorpion sting envenomation in children. *Int J*  
448 *Contemp Pediatr*. 2016;3(3).
- 449 12. Rao KS, Medicine G, Surgeon C. Clinical study of scorpion sting envenomation - clinical profile,  
450 complications, treatment and effect of early treatment with prazosin in preventing the  
451 complications. *Int J Sci Res*. 2021;10(9):7–10.
- 452 13. Singhal A, Mannan R, Rampal U. Epidemiology, clinical presentation and final outcome of  
453 patients with scorpion bite. *J Clin Diagnostic Res*. 2009;3(3):1523–8.
- 454 14. Bawaskar HS, Bawaskar PH. Efficacy and safety of scorpion antivenom plus prazosin compared  
455 with prazosin alone for venomous scorpion (*Mesobuthus tamulus*) sting: randomised open label  
456 clinical trial. *BMJ*. 2011;
- 457 15. Murthy KRK. On scorpion envenoming syndrome: problems of medical ethics and accountability  
458 in medical research in India. *J Venom Anim Toxins*. 2002;8(1):3–17.
- 459 16. Agrawal A, Kumar A, Consul S, Yadav A. Scorpion bite, a sting to the heart! *Indian J Crit Care*  
460 *Med*. 2015;19(4):233–6.

- 461 17. LoVecchio F. Scorpion envenomation causing autonomic dysfunction (North Africa, Middle East,  
462 Asia, South America, and the Republic of Trinidad and Tobago). 2023.
- 463 18. Barish RA, Arnold T. Scorpion Stings. In: Merck Manual Consumer Version. 2022.
- 464 19. Klotz SA, Yates S, Smith SL, Dudley Jr S, Schmidt JO, Shirazi FM. Scorpion Stings and  
465 Antivenom Use in Arizona -. *Am J Med.* 2021;134(8):1034–8.
- 466 20. Shamon Z, Peterfy RJ, Hammoud S, Khazaeni B. Scorpion Toxicity. In: StatPearls. StatPearls  
467 Publishing LLC; 2022.
- 468 21. Kassiri H, Mahijan NM, Hasanvand Z, Shemshad M, Shemshad K, Control V, et al.  
469 Epidemiological survey on scorpion sting envenomation in south-west, Iran. *Zahedan J Reserach*  
470 *Med Sci.* 2012;14(8):80–3.
- 471 22. Duman A, Dagli B, Akoz A, Avcil M, Orun S, Turkdoğan KA. Importance of antivenom in  
472 management of scorpion envenomation with epidemiologic and clinical characteristics. *Biomed*  
473 *Res.* 2017;28(8):3763–8.
- 474 23. Gupta BD, Parakh M, Purohit A. Management of scorpion sting: prazosin or dobutamine. *J Trop*  
475 *Pediatr.* 2010;56(2):115–8.
- 476 24. Bhadani UK, Tripathi M, Sharma S, Pandey R. Scorpion sting envenomation presenting with  
477 pulmonary edema in adults: a report of seven cases from Nepal. *Indian J Med Sci.* 2006;60(1):20–  
478 2.
- 479
